# Supplementary material
Source: publisher figshare collection journal article supplement (https://acs.figshare.com/ndownloader/files/18008855)
Supplement: Supplementary file 1 [file 18008855]

## Supporting Information

# Modulating the Structural Orientation of Nanocellulose Composites through Mechano-stimuli

*Dan Qu, Guang Chu, Patrick Martin, Gleb Vasilyev, Rita Vilensky, and Eyal Zussman\**

Nano Engineering Group, Faculty of Mechanical Engineering, Technion-Israel Institute of  
Technology, Haifa 3200003, Israel

\* E-mail: meeyal@technion.ac.il

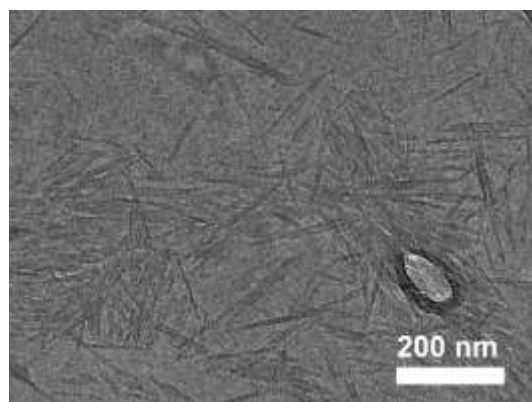

**Figure S1.** TEM image of CNCs nanorods in DMF suspension.

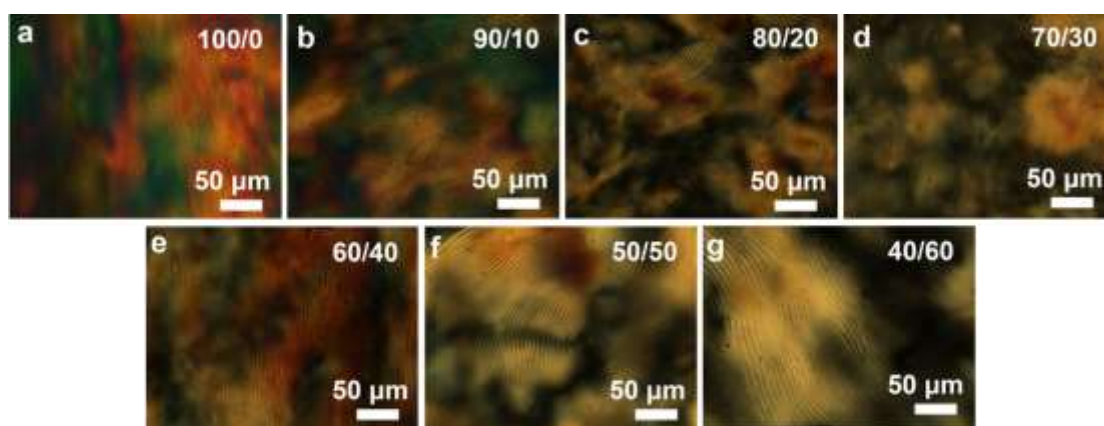

**Figure S2.** POM images of CNC/PU ( $x/y$ ) suspensions with different CNC/PU weight ratios showing fingerprint texture.

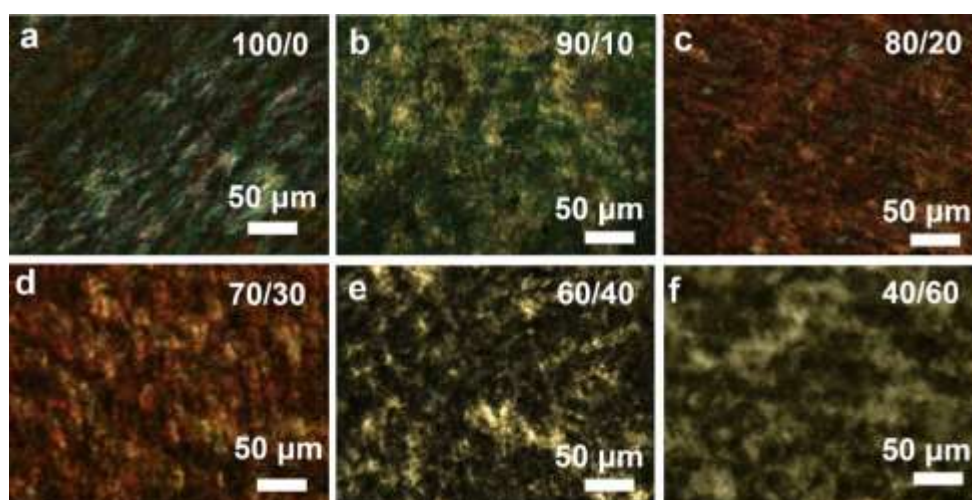

**Figure S3.** POM images of composite CNC/PU ( $x/y$ ) films with different CNC/PU weight ratios showing strong birefringence.

**Table S1.** Thickness of CNC/PU composite films.

| CNC/PU                         | 100/0      | 90/10      | 80/20       | 70/30      | 60/40       | 50/50      |
|--------------------------------|------------|------------|-------------|------------|-------------|------------|
| Thickness<br>( $\mu\text{m}$ ) | $62 \pm 5$ | $54 \pm 7$ | $55 \pm 10$ | $57 \pm 7$ | $55 \pm 10$ | $61 \pm 8$ |

**Surface roughness**

To quantify the film surface roughness we measure,  $R_a$  which is the arithmetic mean of the absolute values of vertical deviation from the mean line through the profile. Also,  $R_q$  (RMS) was measured which is the square root of the arithmetic mean of the square of the vertical deviation from a reference line. Each measurement was repeated *in triplicate* from 4 different regions of a cast film.

$$R_a = \frac{1}{AB} \int_A^B |y| dx = 0.77 \mu\text{m} \pm 0.11$$

$$R_q = \sqrt{\frac{1}{AB} \int_A^B y^2 dx} = 0.97 \mu\text{m} \pm 0.08$$

$R_q$  is greater than  $R_a$ , which may indicate a single large peak, or flaw within the microscopic surface texture raising the RMS value more than the average height value.

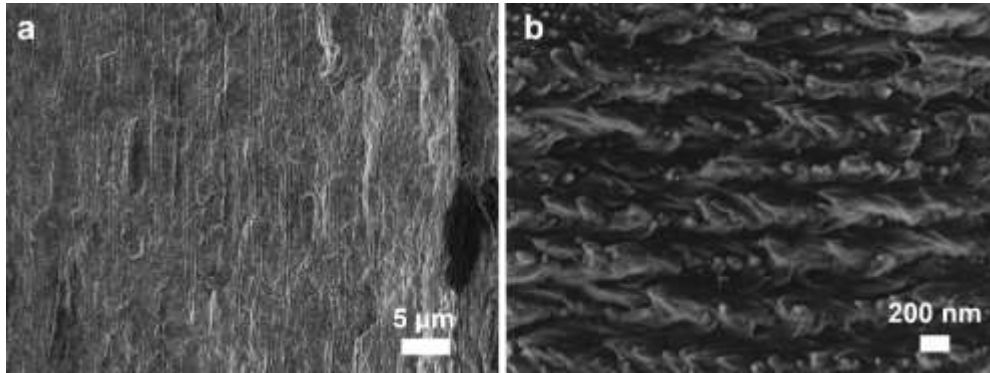**Figure S4.** (a) Low and (b) high magnification SEM images of CNC/PU (40/60) film showing periodical left-handed chiral nematic arrangement.

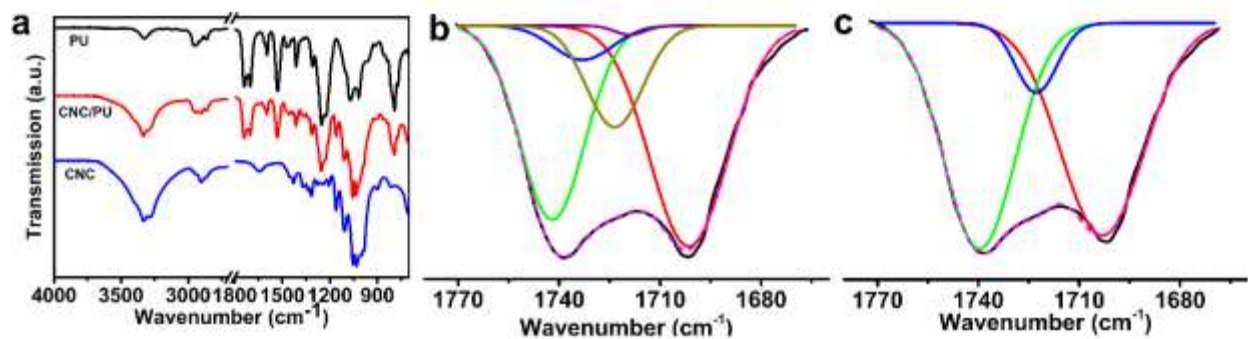

**Figure S5.** FTIR spectra of (a) pure CNC, pure PU and CNC/PU (50/50) composite films. In pure PU film,  $3325\text{ cm}^{-1}$  is N-H stretching vibration,  $2950\text{ cm}^{-1}$  and  $2858\text{ cm}^{-1}$  correspond to C-H stretching bands,  $1701\text{ cm}^{-1}$  is associated with hydrogen bonded C=O,  $1741\text{ cm}^{-1}$  band belongs to free C=O,  $1534\text{ cm}^{-1}$  belongs to Amide II vibration band. In pure CNC film,  $3332\text{ cm}^{-1}$  is O-H stretching vibration. All bands appear in CNC/PU composite film. Deconvolution of carbonyl group (C=O) in pure PU film using (b) five sub-peaks and (c) three sub-peaks.

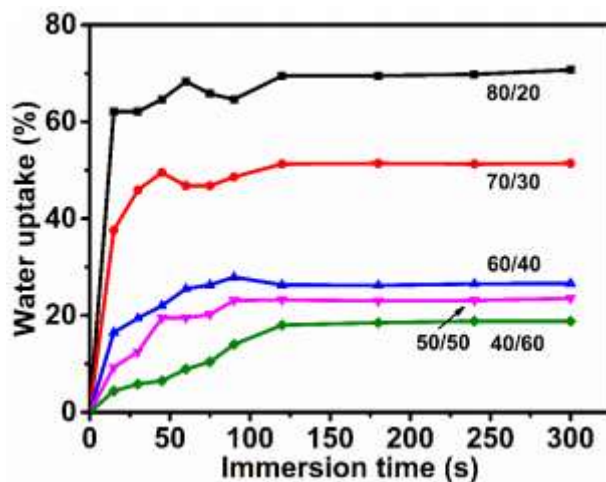

**Figure S6.** Water uptake of composite films with different CNC/PU weight ratios.

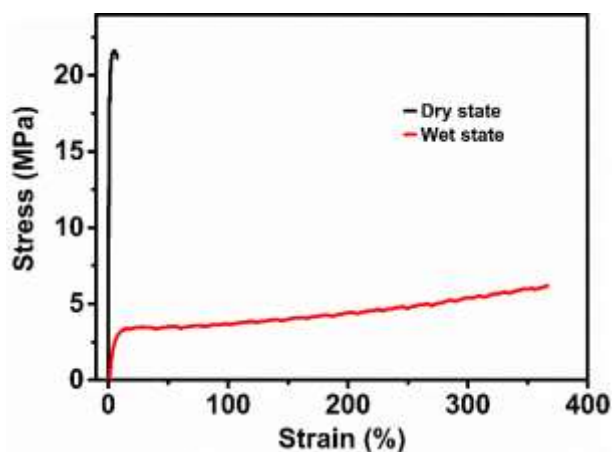

**Figure S7.** Stress-strain curves of CNC/PU (50/50) films in dry and wet states.

**Table S2.** Mechanical properties of neat PU and CNC/PU (50/50) films in dry and wet states (the elongation at break and strength of neat PU film in wet state were not shown due to the limitation of tensile machine).

|                         | PU film   |           | CNC/PU (50/50) film |           |
|-------------------------|-----------|-----------|---------------------|-----------|
|                         | Dry state | Wet state | Dry state           | Wet state |
| Elongation at break (%) | 393       | -         | 7.5                 | 366       |
| Strength (MPa)          | 6.5       | -         | 22                  | 6.2       |
| Young's modulus (MPa)   | 53        | 30        | 6000                | 50        |

**Table S3.** Recovery performance of stretched CNC/PU (50/50) films (200% elongation) in different conditions.

| Recovery conditions               | 25 °C oven | 25 °C water | 75 °C oven | 75 °C water | 95 °C oven | 95 °C water |
|-----------------------------------|------------|-------------|------------|-------------|------------|-------------|
| Recovery ratio in first cycle (%) | 0          | 39.9        | 0          | 53.4        | 0          | 53.4        |

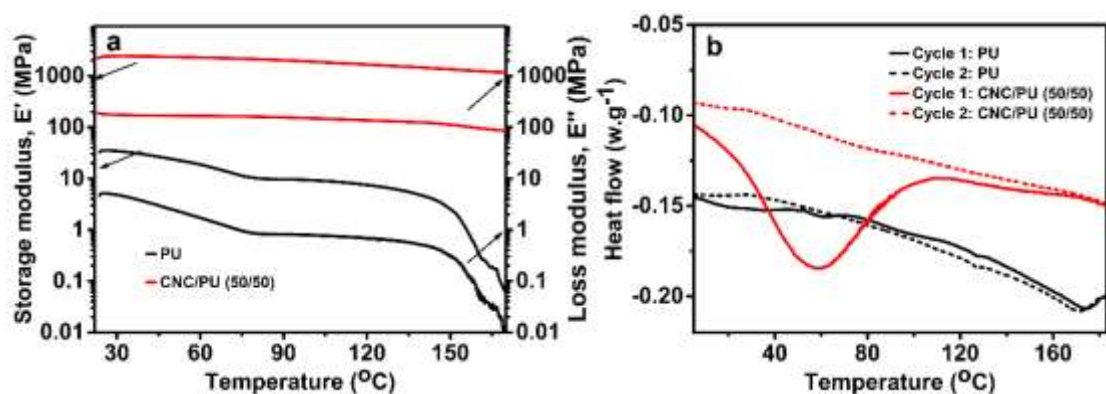

**Figure S8.** (a) Storage and loss moduli of neat PU and composite CNC/PU (50/50) films. (b) Two-cycles DSC curves of pure PU and composite CNC/PU (50/50) films.

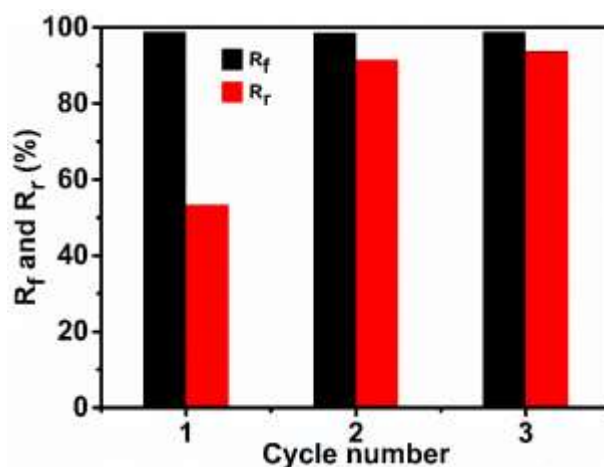

**Figure S9.** Shape fixation ( $R_f$ ) and shape recovery ratio ( $R_r$ ) of composite CNC/PU (50/50) film.

**Table S4.** Moduli of PU and CNC/PU (50/50) films in wet and dry states during shape memory process.

| Cycle number \ Modulus (MPa) | PU film   |           | CNC/PU (50/50) film |           |
|------------------------------|-----------|-----------|---------------------|-----------|
|                              | Wet state | Dry state | Wet state           | Dry state |
| 1                            | 30        | 53        | 55                  | 6000      |
| 2                            | 23        | 46        | 51                  | 6300      |
| 3                            | 24        | 48        | 40                  | 6800      |

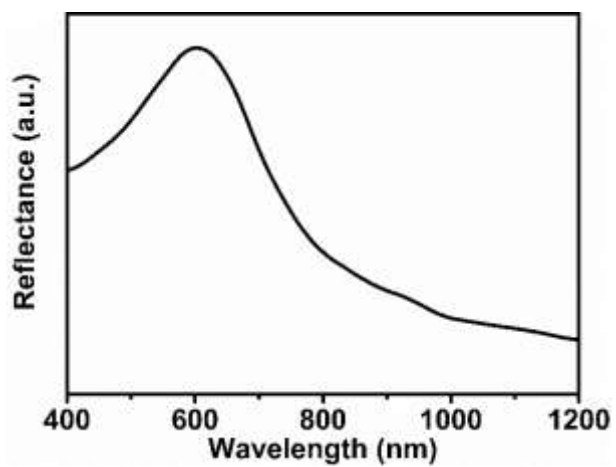

**Figure S10.** UV-Vis-NIR reflection spectrum of CNC/PU (50/50) film at 100% strain.

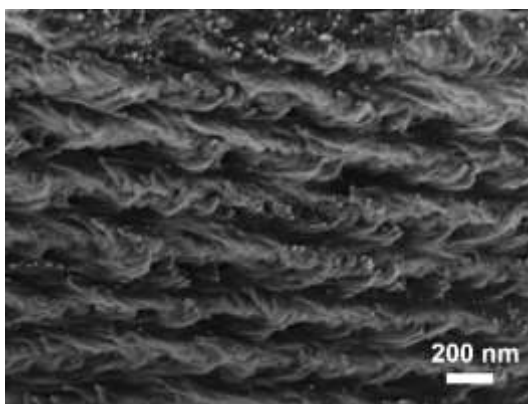

**Figure S11.** SEM image of CNC/PU (50/50) film at 100% strain.

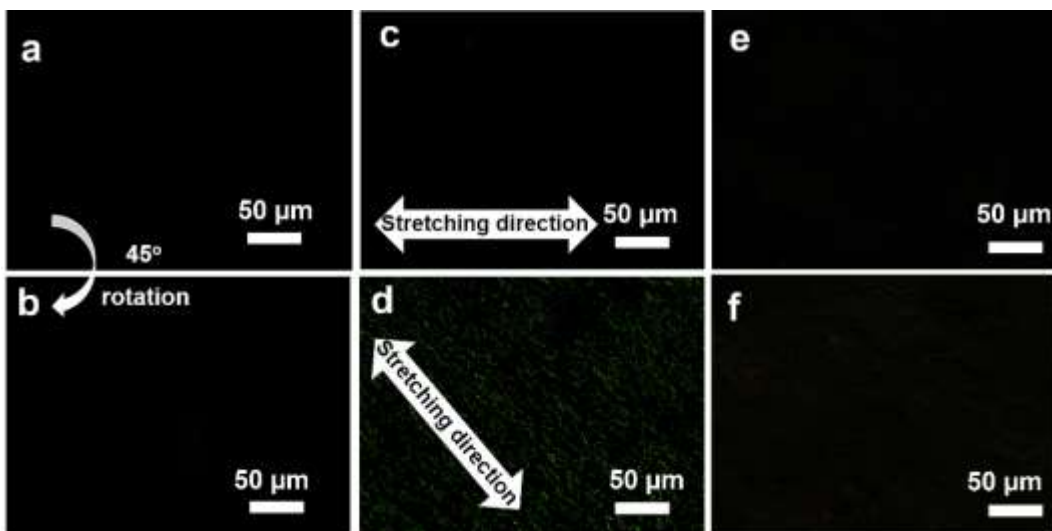

**Figure S12.** POM images of PU films under crossed polarizers using same exposure time with CNC/PU (50/50) film. (a,b) Initial film at 0° and 45° to the polarizers showing isotropic structure, (c,d) 200% stretched film showing dark field at 0° and weak birefringence at 45°, (e,f) the recovered film showing isotropic structure.

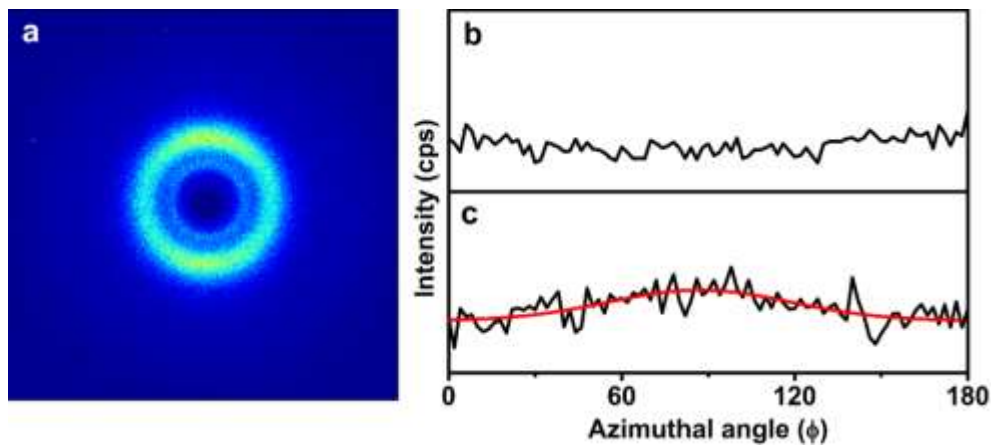

**Figure S13.** (a) Two-dimensional WAXS pattern, and azimuthal intensity profiles for neat PU film stretched up to strain of 200%. (b) Profile at  $2\theta = 21^\circ$ - $22.3^\circ$  showing angle-independence. (c) Profile at  $2\theta = 17^\circ$ - $21^\circ$  indicating orientation of the PU matrix.



**Table S5.** CNC alignment at different stages of the shape memory programming process for CNC/PU (50/50) film.

| Sample         | Herman order parameter ( $f$ ) |
|----------------|--------------------------------|
| Initial film   | 0.01                           |
| 100% strain    | 0.48                           |
| 200% strain    | 0.63                           |
| Recovered film | 0.31                           |

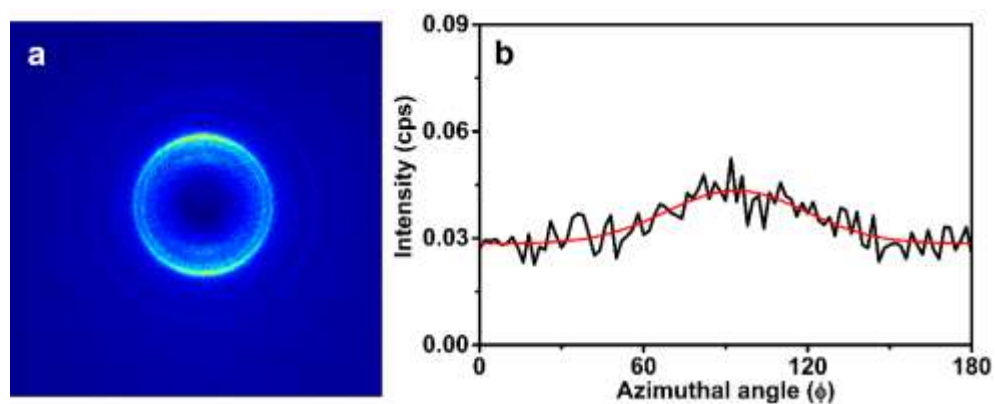

**Figure S14.** (a) Two-dimensional WAXS pattern and (b) azimuthal intensity profile of CNC/PU (50/50) film stretched up to strain of 100%.
